# Supplementary material for: Combing Immunoinformatics with Pangenome Analysis To Design a Multiepitope Subunit Vaccine against Klebsiella pneumoniae K1, K2, K47, and K64
Source: PubMed Central journal article supplement (PMC9431259; doi:10.1128/spectrum.01148-22), 2022-07-12
Supplement: spectrum.01148-22-s0007.pdf [file spectrum.01148-22-s0007.pdf]

Textfile S7 The cDNA sequence of the designed multi-epitope subunit vaccine.

>The cDNA sequence of the designed multi-epitope subunit vaccine

```
ATGATGGGTTTCGTTGCTTCTACCGCTACCCAGGCTGCTGAAGTTGGTCCGGGTCCGGG
TCAGAACAAACATCGTTTACTTCGACCTGGACAAATACGACATCCGTGGTCCGGGTCCG
GGTGACAAATACGACATCCGTTCTGACTTCGCTGCTATGCTGGACGCTGGTCCGGGTCC
GGGTTTCAACGTTCCGTTCTTCTGGCTGGCTGACCAGACCCTGACCCTGGGTCCGGGT
CCGGGTATCCCGGGTATCCGTTTCGACTACCACAACCAGTTCGGTTCTAACGGTCCGGG
TCCGGGTGGTATCAACTACACCACCTTCTTCAACGAAGACTTCAACGACACCGGTCCG
GGTCCGGGTGTTTCGTCCGTACGTTGGTGGTATCAACTACACCACCTTCTTCGGTCC
GGGTCCGGGTGCTCTGGACCCGTGGGTTTTTCATGTTCTCTGCTGGTTACCGTTTCGGTC
CGGGTCCGGGTCTGTGCCTGGGTGCTTCTCCGGCTGCTGGTATCGCTGCTGAAAACGG
TCCGGGTCCGGGTGGTGGTGGTGGTTCGTTACGTTGGTTCCTCTGCGTCGTGGTTCGACG
GTCCGGGTCCGGGTTC AACGCTATCGGTGCTATCGGTGGTGGTGGTTCGTTGGGTGGTTTC
GGTCCGGGTCCGGGTTCGTTACCTACGGTACCATCGTTCACACCCGTGCTGTTACAGAT
CGGTCCGGGTCCGGGTAAACGTAAAGTTCTGGCTCTGATGGTTCGGGTCTGCTGATG
GCTGGTCCGGGTCCGGGTGCTCCGGTTTCTTCTGCTGGTGGTGGTGGTTCCTTCTTCTAC
CAACGGTCCGGGTCCGGGTGCTCAGCCGATCCAGCCGATGCAGACCCAGACCATCCA
GCCGGTGGTCCGGGTCCGGGTACCTGCACGCTCAGTACTCTTTCGACAACGGTTTC
TACGTTGCTGGTCCGGGTCCGGGTCCGGGTGCTACCGCTGCTGCTGCTGCTCCGGCTG
CTAAAACCGGTGGTCCGGGTCCGGGTCTGGACAAATACGTTGTTTACGAAACCTCTCG
TAACGGTCAGCCGGGTCCGGGTCCGGGTGGTAAAGGTGCTCTGATCGGTGCTGCTGCT
GGTGGTGGTCTGGGTGGTCCGGGTCCGGGTGGTGACAACATCGTTCTGAACATGCCGA
ACAACGTTACCTTCGACGGTCCGGGTCCGGGTTCGAAATCTCTGGTAACAAAACCGA
ATCTGACTCTTCTCAGAAAACCAAAAAAATCGGTGCTATCGGTGGTGGTGGTTCGGGT
GGTTTCCTGGGTAAACACCAAAAAACCGGTTATGGCTATCGCTGCTTGCTCTTCTAACAA
AAACGTTCTAACAAAAACGTACCACCGGTATGGGTCCGGCTAACCCGATCGCTTCT
AACTCTACCAAAAAATCTGGTATGCTGATCACCCCGCCCGCTCTGGTGTTAAATCTGC
TCCGAAAAAACCGCTACCGTTCGTCCGACCGAAGGTTCTGACAACGTTCTGGGTTC
AAAAAGCTGGTTCTGGTGAAGGTACCAACAACGGTGGTAAACGTAAACTGGCTAAA
AAAACCGTTGAAGCTAAATGGCGTTCTGGTGGTGGTGGTGGTGGTGGTGGTGGTGGTGGT
CCGCAGGCTGTTGCTAAAACCCCGGTTGAATCTAAACCGGTTACCGGAAAAAACGTT
ACCACCCGGGTGAACCGGTACCTTCATGCTGACCGCTAACGTTAAAAAACAGGGTAA
CATCTACGCTGGTGGTACCCAGTACTCTAACGGTAACCTGGAAGCTGCTGCTAAAATG
ATCAAACGAAATTCGGTGTTCCTTTCACCGTTCTGCTGTCTTCTGCTTACGCTCACGG
TACCCCGCAGAACATCACCGACCTGTGCGCTGAATACCACAACACCCAGATCTACACC
CTGAACGACAAAATCTTCTTACACCGAATCTCTGGCTGGTAAACGTGAAATGGCTAT
CATCACCTTCAAAAACGGTGGTATCTTCCAGGTTGAAGTTCCGGGTTCAGCACATCG
ACTCTCAGAAAAAGCTATCGAACGTATGAAAGACACCCTGCGTATCGCTTACCTGAC
CGAAGCTAAAGTTGAAAAACTGTGCGTTTGGAAACAACAAAACCCCGCACGCTATCGC
TGCTATCTCTATGGCTAAC
```
